## 14 **Summary**

- 15 1. Given the prevalence of missing data on species' traits – Raunkiaeran shortfall  
16 — and its importance for theoretical and empirical investigations, several  
17 methods have been proposed to fill sparse databases. Despite its advantages,  
18 imputation of missing data can introduce biases. Here, we evaluate the bias in  
19 descriptive statistics, model parameters, and phylogenetic signal estimation from  
20 imputed databases under different missing and imputing scenarios.
- 21 2. We simulated coalescent phylogenies and traits under Brownian Motion and  
22 different Ornstein-Uhlenbeck evolutionary models. Missing values were created  
23 using three scenarios: missing completely at random, missing at random but  
24 phylogenetically structured and missing at random but correlated with some  
25 other variable. We considered four methods for handling missing data: delete  
26 missing values, imputation based on observed mean trait value, Phylogenetic  
27 Eigenvectors Maps and Multiple Imputation by Chained Equations. Finally, we  
28 assessed estimation errors of descriptive statistics (mean, variance), regression  
29 coefficient, Moran's correlogram and Blomberg's K of imputed traits.
- 30 3. We found that percentage of missing data, missing mechanisms, Ornstein-  
31 Uhlenbeck strength and handling methods were important to define estimation  
32 errors. When data were missing completely at random, descriptive statistics  
33 were well estimated but Moran's correlogram and Blomberg's K were not well  
34 estimated, depending on handling methods. We also found that handling  
35 methods performed worse when data were missing at random, but  
36 phylogenetically structured. In this case adding phylogenetic information  
37 provided better estimates. Although the error caused by imputation was

38 correlated with estimation errors, we found that such relationship is not linear  
39 with estimation errors getting larger as the imputation error increases.

40 4. Imputed trait databases could bias ecological and evolutionary analyses. We  
41 advise researchers to share their raw data along with their imputed database,  
42 flagging imputed data and providing information on the imputation process.  
43 Thus, users can and should consider the pattern of missing data and then look for  
44 the best method to overcome this problem. In addition, we suggest the  
45 development of phylogenetic methods that consider imputation uncertainty,  
46 phylogenetic autocorrelation and preserve the level of phylogenetic signal of the  
47 original data.

48

49 **Key-words:** bias, Multiple Imputation, trait databases, Phylogenetic Eigenvector  
50 Maps, phylogenetic signal, Phylogenetic Comparative Methods.

51

## 52 **Introduction**

53 Missing data are a ubiquitous feature of real-world datasets (Nakagawa & Freckleton  
54 2008). Lack of information may limit the application of statistical analysis and can lead  
55 to biased estimates and conclusions on the phenomena of interest. In 1976, Donald B.  
56 Rubin proposed a missing-data theory to allow analysis of incomplete datasets (Rubin  
57 1976), explaining how unbiased parameters could be estimated with missing data by  
58 considering the mechanisms causing missing data. These mechanisms were classified in  
59 three categories: missing completely at random (MCAR), missing at random (MAR) and  
60 missing not at random (MNAR). They mean, respectively, that missing values are equally  
61 probable across a dataset, probability of missing data is correlated with other variables  
62 rather than to the variable with missing data (target variable), and probability of missing  
63 data is itself correlated to the target variable and dependent on the missing data (Rubin  
64 1976; Nakagawa & Freckleton 2008; Enders 2010; van Buuren 2012) (Fig.1).

65 When dealing with missing data, the above mechanisms need to be taken into  
66 account before analysis (Rubin 1976). This is because different methods that handle  
67 missing data assume different mechanisms, so using them indiscriminately may bias  
68 parameters estimates (Rubin 1976; Enders 2010; van Buuren 2012). Multiple Imputation  
69 and Full Information Maximum Likelihood methods are currently regarded as the most  
70 appropriate methods to handle missing data, because they work under MAR and MCAR  
71 scenarios and provide unbiased estimates (Enders 2010). In contrast, it is very difficult to  
72 model missing data under a MNAR scenario. This is so due to the need of considering a  
73 model that represents the probability of missing values to occur and because the shape of  
74 the probability density function is not known (Enders 2010; van Buuren 2012).

75 Research in ecology and evolutionary biology usually requires data about species  
76 and their traits to answer different questions from community assembly and

77 ecogeographical rules to correlated evolution, diversification rates and extinction  
78 probability, among others (Purvis et al. 2000; Webb et al. 2002; Gaston et al. 2008;  
79 Goldberg et al. 2010; Lukas & Clutton-Brock 2013; Jetz & Freckleton 2015). Thus, to  
80 facilitate research and make it reproducible and data more accessible (Reichman et al.  
81 2011), ecologists and evolutionary biologists usually create databases that include  
82 information on huge amounts of species and their traits (e.g., (Jones *et al.* 2009; Kattge  
83 *et al.* 2011; Wilman *et al.* 2014). However, as databases become larger, the probability of  
84 having all the necessary data for all species rapidly decreases. This lack of knowledge  
85 about species' traits and their ecological functions was recently defined as the  
86 Raunkiaeran shortfall (Hortal et al. 2015) or Eltonian shortfall (Rosado *et al.* 2015).

87         Owing to the ubiquity of the Raunkiaeran shortfall, some researchers are  
88 interested in filling such gaps in their databases for their own analyses but also to make  
89 them available for other researchers (Swenson 2014; Schrodte *et al.* 2015). To do so, recent  
90 studies suggest the use of phylogenetic information in the imputation process (Guénard  
91 *et al.* 2013; Swenson 2014; Schrodte *et al.* 2015). Phylogenetic information is important  
92 in imputation because closely related species resemble, on average, each other more than  
93 distantly related species. Such phenomenon is commonly known as phylogenetic signal  
94 (Blomberg *et al.* 2003). Consequently, knowing the phylogenetic position of species  
95 could, in principle, be used to perform a good estimation of missing trait values. However,  
96 the relationship between trait divergence and phylogenetic distance may be more complex  
97 (due to distinct evolutionary models) than usually assumed (Hansen & Martins 1996;  
98 Münkemüller *et al.* 2012). For instance, under Ornstein-Uhlenbeck evolutionary model  
99 traits may evolve under selection restrictions where species track a trait optimum, causing  
100 phenotypic resemblance even among phylogenetically distant species (Hansen & Martins  
101 1996). Alternatively, under Early-burst model traits may show evolutionary rates early

102 in species history and later the rates slow down, resulting in phylogenetically closely  
103 related species having different trait values (Blomberg *et al.* 2003; Harmon *et al.* 2010).  
104 Finally, trait evolution may happen under a drift process (e.g., Brownian motion) where  
105 species trait differences are directly correlated with time since divergence (Felsenstein  
106 1985; Hansen & Martins 1996; Freckleton *et al.* 2002). Therefore, imputation methods  
107 should explicitly consider or assume a trait evolutionary model determining the  
108 relationship between species resemblance and phylogenetic proximity (Guénard *et al.*  
109 2013).

110         Nowadays, large, imputed databases already exist that used taxonomic, ecological  
111 or allometric relationships to fill in missing values (Jones *et al.* 2009; Wilman *et al.* 2014).  
112 This highlights the need to critically evaluate the use of imputed databases given that the  
113 reliability of statistical analysis under missing data is dependent on how much values  
114 were missing in the original data, what mechanism caused data to be missing and which  
115 methods were used in the imputation process (Schafer & Graham 2002; Enders 2010; van  
116 Buuren 2012). Moreover, other problems can also arise when testing for phylogenetic  
117 signal (Cavender-Bares *et al.* 2009; Münkemüller *et al.* 2012). In such cases, if analysis  
118 were to be conducted on phylogenetically imputed data, results could be misleading given  
119 that missing values would have been already filled based on their phylogenetic structure,  
120 thus potentially inflating the level of phylogenetic signal. This potential issue can have  
121 important consequences for studies evaluating, for example, niche conservatism, trait  
122 lability, community assembly and diversification (Blomberg *et al.* 2003; Wiens &  
123 Graham 2005; Cavender-Bares *et al.* 2009; Goldberg *et al.* 2010).

124         Considering the current need for complete databases and the use of imputation  
125 methods to accomplish this, we evaluate how the estimation of descriptive statistics,  
126 regression coefficients and phylogenetic signal can be misled by the percentage of

127 missing data, the particular mechanism of missing data, the model of trait evolution and  
128 the choice of methods used to handle missing values. To accommodate all of these  
129 scenarios, we use simulated phylogenies and traits under different combinations of such  
130 conditions. In addition, to address imputation accuracy, we evaluated the relationship  
131 between error caused by imputation and statistical estimation errors.

132

## 133 **Methods**

### 134 *Phylogeny simulation*

135 To evaluate the effect of imputing missing values into sparse databases (i.e. with  
136 missing data), we first simulated 100 coalescent phylogenies with 200 species using the  
137 function *rcoal* from the R package *ape* (Paradis *et al.* 2004). We focused on this  
138 phylogeny size because it has been considered appropriate to evaluate power and  
139 accuracy of phylogenetic analysis (Davis *et al.* 2013; Cooper *et al.* 2015), and it represents  
140 a conservative approximation to database size (e.g. several hundreds to thousands of  
141 species).

142

### 143 *Trait simulation*

144 For each phylogeny, we simulated two traits: a target trait and an auxiliary trait.  
145 The first trait represented the one that would be imputed (i.e. missing-value trait), whereas  
146 the second trait represented an auxiliary trait that would be used to impute values for the  
147 target trait.

148 The target trait was simulated using the *rTraitCont* function from the *ape* package  
149 (Paradis *et al.* 2004). We modeled this trait under a Ornstein-Uhlenbeck evolutionary

150 process (OU) (Gillespie 1996), because it allowed us to simulate trait evolution within a  
151 continuum from evolutionary drift (i.e. Brownian motion) to weak and strong levels of  
152 selection strength on trait evolution (Hansen & Martins 1996; Hansen 1997). Thus, we  
153 could evaluate the performance of imputation methods under different levels of  
154 phylogenetic signal. We fixed the target trait's optimum ( $\Theta$ ) to zero and the trait  
155 interspecific variation ( $\sigma$ ) equal to one. Also, we simulated different selection strengths  
156 by varying  $\alpha$  (selective strength) from 0 to 2, in 0.5 steps (0, 0.5, 1, 1.5 and 2). Such values  
157 covered evolutionary scenarios from Brownian motion (OU  $\alpha = 0$ ) to strong selective  
158 strength (OU  $\alpha = 2$ ).

159 The auxiliary trait represented a variable used to impute values into the target trait.  
160 We simulated auxiliary traits in two ways: (i) correlated with the phylogeny and (ii)  
161 correlated with the target trait but uncorrelated with phylogeny. For (i), we simulated the  
162 trait following Liam Revell (pers. comm.):

$$163 \quad x = ry + \sqrt{1 - r^2} \text{MVN}(0, \sigma^2 \Sigma) \quad \text{eqn 1}$$

164 where  $y$  is the target trait,  $x$  the auxiliary trait, and  $r$  the correlation coefficient between  
165 both traits. We set  $r$  equal to 0.6 and 0.9 to explore the sensibility of our results to the  
166 strength of trait correlation.  $\Sigma$  is the species covariance matrix (Felsenstein 1985; Revell  
167 *et al.* 2008) and  $\sigma^2$  the target trait variation rate calculated as the mean of squared  
168 phylogenetic independent contrasts (Freckleton & Jetz 2009), which was estimated using  
169 the *pic* function from *ape* (Paradis *et al.* 2004). MVN means Multivariate Normal  
170 Distribution and it was simulated using the *fastBM* function from the *phytools* R package  
171 (Revell 2012). This auxiliary trait was later used when simulating the MCAR (Missing  
172 Completely at Random) and MAR.PHYLO (Missing at Random correlated with  
173 phylogeny) (see below).



174 For the second scenario, where the auxiliary trait is correlated with the target trait  
175 but uncorrelated with phylogeny, the auxiliary trait was simulated using equation 1 with  
176  $\Sigma$  having off-diagonal entries equal to zero (i.e. no covariance among species) and  
177 diagonal entries representing, for each species, the sum of all branch lengths from the root  
178 to the tip. We simulated MVN using the *mvrnorm* function in the R package MASS  
179 (Venables & Ripley 2002). When using this auxiliary trait to impute target trait values,  
180 we expected that using the phylogeny into the imputation methods would not improve  
181 our analysis (i.e. provide no information on missing data) since the probability of missing  
182 values would only be correlated with the auxiliary trait and not with the phylogeny.

### 183 *Missing data scenarios*

184 To create missing data, we used the target trait simulated above and deleted  
185 different percentages of its values following three scenarios of missing data: Missing  
186 Completely at Random (MCAR), Missing at Random but phylogenetically structured  
187 (MAR.PHYLO), and Missing at Random but correlated with another phylogenetically  
188 unstructured trait (MAR.TRAIT). We created the MCAR scenario by randomly sampling  
189 a percentage (see below) of species along each phylogeny and replacing their trait values  
190 with missing values. For the MAR.PHYLO scenario, we sampled a species in each  
191 phylogeny and selected a percentage of its closest species to replace their trait values with  
192 missing values, allowing a strong missing data pattern that was phylogenetically  
193 structured. For the last scenario, MAR.TRAIT, we used the auxiliary trait (see above) to  
194 replace values in the target trait. We ordered the values of the auxiliary trait in ascending  
195 order and replaced the first percentage of values of the target trait with missing values.  
196 This represented a missing data pattern correlated with another trait, different to the target  
197 one. For each scenario, we simulated different percentages of missing values in the target  
198 trait: 5, 10, 20, 50, 70 and 90% of missing data. These percentages were chosen to

199 represent common proportions of missing data present in highly used databases such as  
200 PanTHERIA (Jones et al., 2009) and EltonTraits (Wilman *et al.* 2014) (Fig. S1, Appendix  
201 S2).

## 202 *Imputation methods*

203 We evaluated four methods often applied by researchers to handle missing data:  
204 imputation based on averaging values (MEAN), no imputation and simply deleting  
205 missing values (LISTWISE), phylogenetic eigenvector maps (PEM), and multiple  
206 imputation by chained equations (MICE).

207 We used the MEAN method to impute missing values by filling them with the  
208 average of the observed values of the target trait. Under the LISTWISE method, we did  
209 not impute values but simply deleted those species with missing values in the phylogenies  
210 before the analyses. The PEM method uses both phylogenetic eigenvectors (Diniz-Filho  
211 *et al.* 1998) and traits to impute data considering different OU processes (Guénard *et al.*  
212 2013). We applied this method in two ways: first, using only the phylogenetic  
213 eigenvectors (PEM.no trait) and, second, using these eigenvectors and the auxiliary trait  
214 (PEM.trait). By applying the PEM method in these two ways allowed us to evaluate  
215 whether phylogenetic information alone could impute data well or auxiliary traits were  
216 necessary. Eigenvector selection and fitting of trait evolutionary models were performed  
217 using the *MPSEM* R package (Guénard *et al.* 2013) using forward selection based on the  
218 second-order Akaike Information Criterion. The MICE method simulates several possible  
219 values for missing data from a posterior predictive distribution, then runs analysis and  
220 pools results over all simulated data (van Buuren *et al.* 2006). We chose this method  
221 because it is flexible and allows imputing categorical, continuous, and non-normally  
222 distributed data (van Buuren *et al.* 2006). We applied MICE by creating 10 datasets to  
223 run our analysis over them and pooled the results. The quantity of datasets created by

224 MICE is dependent on the percentage of missing data and more datasets can provide  
225 higher accuracy and power in the analyses (Graham *et al.* 2007; Enders 2010; van Buuren  
226 2012). However, because our objective was simply to estimate statistical bias instead of  
227 inference power, 10 datasets can be considered appropriate (Graham *et al.* 2007). As with  
228 the PEM method, we applied MICE in two ways: only considering the auxiliary trait  
229 (MICE) and using this trait plus the phylogenetic eigenvectors selected as in PEM  
230 (MICE.phylo). We imputed data with MICE using the *mice* R package (van Buuren &  
231 Groothuis-Oudshoorn 2011).

232 We simulated 540 scenarios representing each combination of missing data  
233 percentage, mechanism, OU selection strength, and imputation methods. For each  
234 scenario, we simulated 100 replicates, thus producing 54000 independent results. Finally,  
235 we averaged 10 replicates for each scenario and ended up with 5400 simulations to  
236 analyze.

### 237 *Estimating Phylogenetic Signal*

238 We calculated the phylogenetic signal (PS) in our simulated phylogenies using  
239 two metrics: Blomberg's K (Blomberg *et al.* 2003) calculated with the *phylosig* function  
240 of *phytools* (Revell 2012) and Moran's *I* correlograms (Gittleman & Kot 1990; Diniz-  
241 Filho 2001). For these correlograms, we created a phylogenetic distance matrix per  
242 phylogeny using the *cophenetic* function of *ape* (Paradis *et al.* 2004) and built the  
243 correlograms with the *lets.correl* function of the *letsR* R package (Vilela & Villalobos  
244 2015). Then, based on the correlogram, we used the intercept of the following linear  
245 model as indicative of PS:

246

$$247 \quad \text{PS}_{\text{Moran}} = \alpha_1 - \frac{\text{cov}(\alpha, \beta)}{\text{var}(\beta)} * \beta \quad \text{eqn 2}$$

248 where  $cov$  is the covariance between the mean within-class distance and Moran's Index,  
249  $var$  is the variance of the mean within-class distance,  $\alpha$  is the value in each correlogram  
250 distance class, and  $\alpha_1$  is the value in the first distance class.

### 251 *Imputation effects on phylogenetic signal*

252 To evaluate the effect of using imputed trait data for estimating phylogenetic  
253 scenario. In particular, we estimated PS for the original target trait values before they  
254 were deleted by the missing data mechanisms and estimated PS again after they were  
255 filled by the imputation methods. Such PS delta was defined as:

$$256 \quad PS_{\text{delta}} = (PS_{\text{imputed}} - PS_{\text{original}}) / PS_{\text{original}} \quad \text{eqn 3}$$

257 where  $PS_{\text{imputed}}$  is the PS calculated after imputing missing data,  $PS_{\text{original}}$  is the observed  
258 PS. If  $PS_{\text{delta}}$  is positive, there is a gain in PS (i.e. more PS than the original data), meaning  
259 that imputing data increased the phylogenetic structure of the target trait. Conversely, if  
260  $PS_{\text{delta}}$  is negative, there is a decrease in PS (i.e. less PS than the original data), meaning  
261 that imputing data decreased phylogenetic structure and made species' trait values seem  
262 more phylogenetically independent than they originally were.  $PS_{\text{delta}}$  equal to zero  
263 represents no change in trait phylogenetic structure (i.e. no imputation effect).

### 264 *Imputation effects on descriptive statistics*

265 Traditionally, performance evaluation of imputation methods have focused on  
266 common descriptive statistics such as (mean, variance, regression coefficient) (Collins *et*  
267 *al.* 2001; van Buuren *et al.* 2006; Penone *et al.* 2014) instead of phylogenetic patterns.  
268 Therefore, we also evaluated the effect of imputed data on the estimation of such  
269 descriptive statistics. We calculated the mean and variance of the target trait as well as  
270 the regression coefficient (Ordinary Least Square) between the target trait and the  
271 auxiliary trait, before producing missing data and after imputing such data. Next, we

272 measured the estimation error for these statistics as the mean squared error (MSE), as  
273 below:

$$274 \quad \text{MSE}_i = \frac{\sum_1^n (\tau_1 - \tau_0)^2}{n} \quad \text{eqn 4}$$

275 where  $\tau_1$  represents the statistics calculated over imputed traits,  $\tau_0$  is the statistics  
276 calculated from original traits,  $n$  means the number of simulations averaged to result  $i$ th  
277 MSE value.

### 278 *Imputation error*

279 To measure the potential error introduced by imputation methods, that is the  
280 deviation between imputed and original data, we followed Penone *et al.* (2014) and used  
281 the normalized root mean squared error (NRMSE):

$$282 \quad \text{NRMSE} = \sqrt{\frac{\text{mean}((y - y_{\text{imputed}})^2)}{\max(y) - \min(y)}} \quad \text{eqn 5}$$

283 where  $y$  is the original trait value,  $y_{\text{imputed}}$  is the imputed value,  $\max(y)$  and  $\min(y)$  are the  
284 maximum and minimum values of the original trait, respectively. NRMSE varies between  
285 0, no estimation error, and 1, maximum error (Oba *et al.* 2003).

### 286 *Overall analyses*

287 We were also interested on evaluating the effects of percentage of data missing,  
288 missing data mechanism, OU selection strength, and imputation methods as factors  
289 influencing the abovementioned effects of imputation (estimation errors:  $\text{PS}_{\text{delta}}$  and MSE  
290 of descriptive statistics). To do so, we built linear models with these factors (e.g.  
291 percentage of data missing) and their interactions as predictors and estimation errors,  
292 separately, as individual responses. We specified the models using the *dredge* function  
293 from the *MuMIn* R package (Bartón 2016) and ranked the different models using delta

294 AICc (Burnham & Anderson 2002). In addition, given concerns on the accuracy of  
295 imputation methods (Guénard *et al.* 2013; Penone *et al.* 2014), we also evaluated the  
296 relationship between imputation error (NRSME) and estimation errors ( $PS_{\text{delta}}$  and MSE)  
297 caused by imputation. All simulations and analysis were run in R 3.2.2 (R Core Team  
298 2015).

## 299 **Results**

300 In our simulations we found that differences in estimation errors were dependent  
301 on missingness mechanism, imputation method, evolutionary model, percentage of  
302 missing data and statistics being estimated. Moreover, imputation errors showed different  
303 results between trait correlations (target vs. auxiliary trait;  $r$ ) of 0.6 and 0.9, but  
304 descriptive statistics and phylogenetic signal errors did not show different results  
305 concerning this correlation. Therefore, we present all results for  $r = 0.6$  and only those  
306 for  $r = 0.9$  corresponding to *Imputation error* (see below). Full results for  $r = 0.9$  can be  
307 found in the Appendix S1.

308 Not surprisingly, our results showed a clear tendency of increasing error in  
309 estimating phylogenetic signal and descriptive statistics as the percentage of missing data  
310 gets larger (Fig. 2). We did not identify a clear threshold in the amount of missing data  
311 that would guarantee lower statistical errors. For the best imputation methods (MICE.phy,  
312 PEM.trait, PEM.notrait; see below) lower errors were possible for as low as 30% and up  
313 to 70% of missing data in the target trait.

314 When data were missing completely at random (MCAR), most imputation  
315 methods showed good performance (Fig. 3-5; Fig. S2 and S3, in Appendix S2), except  
316 the MEAN method. Nevertheless, when estimating Blomberg's K only LISTWISE and  
317 PEM.trait resulted in low proportional changes (Fig. 3). For mean, variance and

318 regression coefficient MSE, imputation methods worked better when data were missing  
319 at random but correlated with another trait (MAR.TRAIT) than when data were missing  
320 and phylogenetically structured (MAR.PHYLO) (Fig. 5; Fig. S2 and S3, Appendix S2).  
321 Nevertheless, the lowest proportional changes in Blomberg's K and  $PS_{Moran}$  were  
322 observed under the MAR.PHYLO scenario (Fig. 3 and 4).

323         The level of selection strength on trait evolution under the OU process was also  
324 important for the performance of imputation methods (Table 1). Accordingly, we found  
325 a tendency  $PS_{\Delta}$  and MSE to decrease as the selection strength increased from pure  
326 evolutionary drift (i.e. OU alpha = 0; Brownian motion) to strong selection (OU alpha =  
327 2) (Fig. 3-5; Fig. S2 and S3, Appendix S2).

328         The less sensitive methods were those that considered phylogenetic information  
329 in the imputation process (Fig. 3-5). PEM.trait, PEM.notrait, and MICE.phylo showed  
330 results less sensitive over different mechanisms of missing data (Fig. 3-5; Fig. S2 and S3,  
331 Appendix S2). From these three methods, PEM.trait was the less sensitive. The MEAN  
332 method was the most sensitive, similarly to MICE under MAR.PHYLO scenario (Fig. 3-  
333 5; Fig. S2 and S3, Appendix S2). The LISTWISE method caused the lowest changes in  
334 Blomberg's K under all missing data mechanisms (Fig. 3) and for descriptive statistics  
335 only under the MCAR mechanism (Fig. 5; Fig. S2 and S3, Appendix S2).

336         Phylogenetic signal metrics (Blomberg's K and  $PS_{Moran}$ ) were lower than the  
337 original (before imputation) when using MEAN and MICE methods (Fig. 3 and 4). All  
338 other methods estimated  $PS_{Moran}$  correctly under most simulated scenarios (Fig. 4),  
339 whereas the estimation of Blomberg's K showed different patterns (Fig. 3). Blomberg's  
340 K was overestimated by PEM.trait and PEM.notrait and underestimated by MICE, even  
341 under the MCAR missing mechanism (Fig. 3). Nevertheless, Blomberg's K estimation  
342 errors decreased when phylogenetic eigenvectors were used in MICE.phylo (Fig. 3).

343 Descriptive statistics (mean, variance, and regression coefficient) were well  
344 estimated by all imputation methods (except MEAN) under MCAR. MAR.TRAIT and  
345 MAR-PHYLO generated biased estimations, but these biases were higher under MAR-  
346 PHYLO (Fig. 5, Fig. S2 and S3, Appendix S2). Nonetheless, variance had high  
347 estimations errors in MAR-PHYLO and MAR-TRAIT, independent of the imputation  
348 methods (Fig. S3, Appendix S2). For all descriptive statistics, considering phylogenetic  
349 structure improved estimations in MAR.PHYLO (Fig. S5, Fig. 2 and 3, Appendix S2).

350 Imputation error was lower when correlation ( $r$ ) between the target and auxiliary  
351 traits was 0.9 than  $r$  equal 0.6. When traits were moderately correlated ( $r = 0.6$ ), the lowest  
352 imputation error was found under missing completely at random (MCAR) scenarios (Fig.  
353 S4, Appendix S2) and when using imputation methods that considered phylogenetic  
354 information (PEM.trait, PEM.notrait, and MICE.phylo) (Fig. S4, Appendix S2).  
355 Moreover, all imputation methods performed better under the MAR.TRAIT than under  
356 MAR.PHYLO missing mechanism, but still poorly than under MCAR (Fig. S4, Appendix  
357 S2). When traits were strongly correlated ( $r = 0.9$ ), the MICE methods presented lower  
358 imputation errors than when these traits were correlated moderately ( $r = 0.6$ ). The  
359 PEM.notrait method increased its imputation errors when trait correlation was strong ( $r$   
360 = 0.9) and PEM.trait was not influenced by correlation strength.

361 We found that estimation errors of descriptive statistics (MSE), Blomberg's  $K$ ,  
362  $PS_{Moran}$  and imputation error (NRMSE) were influenced by all factors individually and  
363 their interactions (Table 1). Despite some differences among selected models in respect  
364 to the two- and three-way interactions, all models had interactions among all factors in  
365 some level (Table 2). Finally, we found that imputation errors were correlated with  
366 estimation errors ( $PS_{delta}$  and MSE) (Fig. 6). In addition, the imputation error and



367 estimation error relationship evaluated here was asymptotic in log-scale, thus as  
368 imputation error increases the estimation error increases faster (Fig. 7).

## 369 **Discussion**

370 Ecologists and evolutionary biologists are increasingly creating, using, and  
371 sharing large trait databases that are inevitably sparse and often completed by imputing  
372 missing values (Guénard *et al.* 2013; Swenson 2014; Schrodte *et al.* 2015). Here we argue  
373 that we should be extremely careful when using imputed databases, even for the  
374 estimation of simple parameters (i.e. means, variances and regression coefficients). Our  
375 findings revealed that estimations based on imputed data depends on every aspect of data  
376 property and strategy of analysis, as percentage of missing data, source/mechanism of  
377 absence, trait evolution, methods for gap filling, and statistics or parameters to be  
378 estimated. This has commonly been acknowledged in statistical research (Rubin 1976;  
379 Enders 2010) and should begin to be so in the ecological and evolutionary research as  
380 claimed by Nakagawa & Freckleton (2008). Based on our results, we can infer that the  
381 large changes in the estimations, due to different analytical choices, may also be an  
382 important cause of irreproducibility in our field (Borregaard & Hart 2016).

383 The most pervasive obstacle for deriving conclusions from large datasets is simply  
384 the proportion of those species lacking data. Previous studies found that reliable  
385 estimations from imputed data can be made when up to 60% of the values were missing  
386 (Barzi 2004; Penone *et al.* 2014). However, in our results, the effect of missing data  
387 percentage was not direct, but rather interacted with all of the other aspects evaluated  
388 here. Thus, there is no simple way of deriving a threshold on how much missing data  
389 would be allowed to be imputed and still make reliable estimations.

390           Knowing the causes of data absence is the first issue to be sorted out before any  
391 analysis (van Buuren 2012). The most common assumption in ecological and  
392 evolutionary studies is that data is missing completely at random (MCAR). This is evident  
393 in the wide variety of functions of the most commonly used software (the R programming  
394 language) allowing deleting missing values indiscriminately. Indeed, if data were under  
395 MCAR, previous findings and ours showed that estimations based on deletions and  
396 imputations could safely be made (Nakagawa & Freckleton 2010; Penone *et al.* 2014;  
397 Taugourdeau *et al.* 2014). However, biological data are rarely missing completely at  
398 random (Nakagawa & Freckleton 2008; Enders 2010). For instance, bias in ecological  
399 data absence can be related to the fact that some taxa are most studied than others  
400 (Gonzalez-Suarez *et al.* 2012). Moreover, such bias can stem from body mass differences  
401 among species, where large species have a higher probability of being described first  
402 (Vilela *et al.* 2014) and have their data collected (Gonzalez-Suarez *et al.* 2012) compared  
403 to small species. Also, species present in easily accessible regions are better studied than  
404 those occurring in regions that are hard to access (Reddy & Dávalos 2003). In our  
405 simulations, higher biased estimates were found when data were missing at random but  
406 correlated with other variable (MAR), especially phylogeny (MAR.PHYLO). Such  
407 results differ from those found by Penone *et al.* (2014), who did not find significant  
408 estimation differences among missing data mechanisms. This discrepancy could be  
409 related to our way of simulating MAR.PHYLO, creating a stronger phylogenetic structure  
410 than that simulated by them.

411           Our simulations revealed that imputation methods considering phylogenetic  
412 structure (PEM.trait, PEM.notrait and MICE.phylo) performed better than methods not  
413 doing so (MEAN, LISTWISE, and MICE) under all missing data mechanisms (MCAR,  
414 MAR.PHYLO, and MAR.TRAIT). Such findings support previous claims favoring

415 “phylogenetic imputation” as a powerful tool in predicting missing species values  
416 (Penone *et al.*, 2014; Swenson 2014). More interestingly, our results showed that some  
417 phylogenetic imputation methods (PEM.notrait) perform better than non-phylogenetic  
418 ones, even when missing data was uncorrelated with phylogeny but to an auxiliary trait  
419 (MAR.TRAIT). This result was unexpected based on missing data theory, which suggests  
420 that under MAR.TRAIT some variable correlated with missing data probability is  
421 required to guarantee reliable estimations (Enders 2010).

422 Overall, PEM.trait performed best among all imputation methods tested. A  
423 potential caveat of this method is the imputation of a single value for each missing datum,  
424 thus not accounting for uncertainty of the imputed value. Consequently, PEM.trait (or  
425 PEM in general) may underestimate standard errors and bias subsequent hypothesis  
426 testing (i.e. increasing Type I error rates) (Enders 2010; van Buuren 2012). To avoid such  
427 biases, the statistical literature suggests using multiple imputation methods (Schafer &  
428 Graham 2002; Enders 2010; van Buuren 2012). However, our results did not show better  
429 performance of MICE, even when including phylogenetic information, in estimating  
430 descriptive statistics or phylogenetic signal compared to PEM. Despite multiple  
431 imputation being one of the most suggested methods for handling missing data (van  
432 Buuren 2012), additional research is necessary to evaluate its performance with  
433 phylogenetically structured data.

434 Filling missing values by averaging the observed ones (MEAN) or simply deleting  
435 species with missing values (LISTWISE) generated poor estimates, which is related to  
436 the fact that both methods assume that data is MCAR. MEAN only worked satisfactorily  
437 for estimating the trait average. LISTWISE disrupts the distribution of trait values, thus  
438 results in biased estimates (Enders 2010). However, this method performed well when  
439 estimating phylogenetic signal. This is encouraging, given that researchers interested in

440 trait phylogenetic signal usually delete missing values (Blomberg & Garland 2002;  
441 Kamilar *et al.* 2013) thus guaranteeing potentially unbiased results.

442 Phylogenetic imputation is based on the assumption of target traits being  
443 phylogenetically structured (i.e. showing phylogenetic signal; Swenson 2014). However,  
444 phylogenetic structure is dependent on how traits evolved (Diniz-Filho 2001; Guénard *et*  
445 *al.* 2013). Accordingly, trait evolution was an important issue in our study. Across our  
446 simulated scenarios, estimation errors were higher when target traits were simulated  
447 under Brownian motion (BM) than under OU processes, agreeing with previous study  
448 (Guénard *et al.* 2013). Better estimates under OU than BM processes may result from  
449 higher trait resemblance and lower variance among species generated when increasing  
450 selection strength under OU processes (Hansen 1997; Butler & King 2004). Thus,  
451 predicting missing values of target traits will benefit from knowing their particular  
452 evolutionary model and will be more accurate if such traits evolved under strong selection  
453 regimes. Again, this suggests that researchers need to find the appropriate evolutionary  
454 model for their target traits before judging the need to use phylogenetic imputation  
455 methods for handling missing data. It should be noted, however, that fitting evolutionary  
456 models over incomplete data could itself be biased owing to the use of observed values  
457 only and thus pruned phylogenies (Slater *et al.* 2012).

458 Despite we showed phylogenetic imputation may recover descriptive statistics,  
459 phylogenetic imputation methods may produce bias when estimating phylogenetic signal.  
460 More specifically, our findings suggest that such methods can actually alter the original  
461 phylogenetic structure of the trait (i.e. the structure if data were complete). In fact, PS  
462 may be incorrectly estimated even under MCAR. Moreover, when using Blomberg's K,  
463 imputation by PEM overestimated the original phylogenetic signal of the target trait (i.e.  
464 created when the trait was simulated) whereas MICE.phylo underestimated it.

465 In addition, PS estimation errors were dependent on the evaluated metric.  
466 Regardless of the simulated scenario, estimation errors were lower for PS based on  
467 Moran's I correlogram than Blomberg's K. Similarly, Münkemüller *et al.* (2012) showed  
468 that Moran's I is less sensible than Blomberg's K to changes in trait phylogenetic  
469 structure even when random noise is added. Blomberg's K measures a global pattern  
470 along a phylogeny, based on observed and expected total trait variance under Brownian  
471 motion (Blomberg *et al.* 2003), whereas Moran's I correlogram measures the correlation  
472 of trait values within different phylogenetic distance classes (Gittleman & Kot 1990).  
473 Therefore, changes in total trait variance caused by imputation may not have strong  
474 impacts on within-class correlations, rendering Blomberg's K more sensitive than  
475 Moran's I to such changes.

476 New proposed methods to fill sparse databases currently concerns about their  
477 degree of imputation error, that is how much imputed values deviate from the original  
478 trait values (Guénard *et al.* 2013; Penone *et al.* 2014; Schrodte *et al.* 2015). We found that  
479 single and multiple phylogenetic imputation methods can be highly accurate, resulting in  
480 small deviations between imputed and observed values, as suggested by other authors  
481 (Guénard *et al.* 2013; Penone *et al.* 2014; Diniz-Filho *et al.* 2015; Schrodte *et al.* 2015). In  
482 addition, we found that imputation error was positively correlated with estimation errors  
483 but their relationship was not linear. That is, increasing imputation error causes estimation  
484 errors to increase much more rapidly. This is particularly relevant if researchers were to  
485 use imputed databases blindly –without correctly treating imputed values. Such practice  
486 could create spurious results. This is because even if imputation is accurate, imputed  
487 values simply represent one among several possibilities without providing information  
488 on imputation uncertainty. In fact, using an accurately imputed database does not

489 necessarily mean that the original trait distribution and its relationship with other  
490 variables will be recovered (van Buuren 2012).

#### 491 *Concluding remarks*

492           Instead of providing imputed trait databases, we should focus on treating missing  
493 values with appropriate methods. We have shown here that such methods should consider  
494 phylogenetic information. With the increase of computational literacy among ecologists  
495 and evolutionary biologists (Ram 2013), we encourage researchers to use simulations of  
496 their data and methods to find the appropriate solution for their study goals. Furthermore,  
497 researchers need to develop phylogenetic methods that consider imputation uncertainty  
498 and preserve the original data's phylogenetic signal. Missing data is one of the most  
499 pervasive features of trait databases and the only effective solution for this Raunkiaeran  
500 shortfall is collecting more data. Nevertheless, acknowledging such shortfall instead of  
501 ignoring it will effectively help guiding research towards solving it.

#### 502 **Acknowledgements**

503 We thank G. Guénard for advice on PEM and L. Revell for help on evolutionary  
504 simulations. L.J. was supported by a CAPES doctoral fellowship. FV was supported by a  
505 BJT "Science without borders" CNPq grant. L.M.B. and J.A.F.D.F. are continuously  
506 supported by CNPq productivity grants.

507

## 508   **References**

- 509   Bartón, K. (2016). MuMIn: multi-model inference. R package version 1.15.6.
- 510   Barzi, F. (2004). Imputations of Missing Values in Practice: Results from Imputations  
511       of Serum Cholesterol in 28 Cohort Studies. *American Journal of Epidemiology*,  
512       **160**, 34–45.
- 513   Blomberg, S.P. & Garland, T. (2002). Tempo and mode in evolution: phylogenetic  
514       inertia, adaptation and comparative methods. *Journal of Evolutionary Biology*, **15**,  
515       899–910.
- 516   Blomberg, S.P., Garland, T. & Ives, A.R. (2003). Testing for phylogenetic signal in  
517       comparative data: behavioral traits are more labile. *Evolution*, **57**, 717–745.
- 518   Borregaard, M.K. & Hart, E.M. (2016). Towards a more reproducible ecology.  
519       *Ecography*, **39**, 349–353.
- 520   Burnham, K.P. & Anderson, D.R. (2002). *Model Selection and Multimodel Inference*,  
521       2nd edn. Springer-Verlag, New York, NY.
- 522   Butler, M.A. & King, A.A. (2004). Phylogenetic Comparative Analysis : A Modeling  
523       Approach for Adaptive Evolution. *The American Naturalist*, **164**, 683–695.
- 524   van Buuren, S. (2012). *Flexible Imputation of Missing Data*, 1st edn. Chapman and  
525       Hall/CRC, Boca Raton, FL.
- 526   van Buuren, S., Brands, J.P.L., Groothuis-Oudshoorn, K. & Rubin, D.B. (2006). Fully  
527       conditional specification in multivariate imputation. *Journal of Statistical*  
528       *Computation and Simulation*, **76**, 1049–1064.
- 529   van Buuren, S. & Groothuis-Oudshoorn, K. (2011). mice : Multivariate Imputation by  
530       Chained. *Journal of Statistical Software*, **45**.
- 531   Cavender-Bares, J., Kozak, K.H., Fine, P.V. a & Kembel, S.W. (2009). The merging of  
532       community ecology and phylogenetic biology. *Ecology letters*, **12**, 693–715.
- 533   Collins, L.M., Schafer, J.L. & Kam, C.M. (2001). A Comparision of Inclusive and  
534       Restrictive Strategies in Modern Missing Data Procedures. *Psychological Methods*,  
535       **6**, 330–351.
- 536   Cooper, N., Thomas, G.H., Venditti, C., Meade, A. & Freckleton, R.P. (2015). A  
537       cautionary note on the use of Ornstein Uhlenbeck models in macroevolutionary.  
538       *Biological Journal of the Linnean Society*, **118**, 64-77
- 539   Davis, M.P., Midford, P.E. & Maddison, W. (2013). Exploring power and parameter  
540       estimation of the BiSSE method for analyzing species diversification. *BMC*  
541       *evolutionary biology*, **13**, 38.
- 542   Diniz-Filho, J.A.F. (2001). Phylogenetic autocorrelation under distinct evolutionary  
543       process. *Evolution*, **55**, 1104–1109.
- 544   Diniz-Filho, J.A.F., Sant’Ana, C.E.R. & Bini, L.M. (1998). An Eigenvector Method for  
545       estimating Phylogenetic Inertia. *Evolution*, **52**, 1247–1262.
- 546   Diniz-Filho, J.A.F., Villalobos, F. & Bini, L.M. (2015). The best of both worlds :  
547       Phylogenetic eigenvector regression and mapping. *Genetics and Molecular*  
548       *Biology*, **38**, 396–400.
- 549   Enders, C.K. (2010). *Applied Missing Data Analysis*, 1st edn. New York, NY.



- 550 Felsenstein, J. (1985). Phylogenies and the Comparative Method. *The American*  
551 *Naturalist*, **125**, 1–15.
- 552 Freckleton, R.P., Harvey, P.H. & Pagel, M. (2002). Phylogenetic Analysis and  
553 Comparative Data : A Test and Review of Evidence. *The American naturalist*, **160**,  
554 712–726.
- 555 Freckleton, R.P. & Jetz, W. (2009). Space versus phylogeny: disentangling  
556 phylogenetic and spatial signals in comparative data. *Proceedings of the Royal*  
557 *Society B*, **276**, 21–30.
- 558 Gaston, K.J., Chown, S.L. & Evans, K.L. (2008). Ecogeographical rules: elements of a  
559 synthesis. *Journal of Biogeography*, **35**, 483–500.
- 560 Gillespie, D. (1996). Exact numerical simulation of the Ornstein-Uhlenbeck process and  
561 its integral. *Physical Review E*, **54**, 2084–2091.
- 562 Gittleman, J.L. & Kot, M. (1990). Adaptation: Statistics and a Null model for estimating  
563 phylogenetic effects. *Systematic Zoology*, **39**, 227–241.
- 564 Goldberg, E.E., Kohn, J.R., Lande, R., Robertson, K. a., Smith, S. a. & Iqbal, B. (2010).  
565 Species Selection Maintains Self-Incompatibility. *Science*, **330**, 493–495.
- 566 Gonzalez-Suarez, M., Lucas, P.M. & Revilla, E. (2012). Biases in comparative analyses  
567 of extinction risk: mind the gap. *The Journal of Animal Ecology*, **81**, 1211–22.
- 568 Graham, J.W., Olchowski, A.E. & Gilreath, T.D. (2007). How many imputations are  
569 really needed? Some practical clarifications of multiple imputation theory.  
570 *Prevention Science*, **8**, 206–213.
- 571 Guénard, G., Legendre, P. & Peres-Neto, P. (2013). Phylogenetic eigenvector maps: a  
572 framework to model and predict species traits. *Methods in Ecology and Evolution*,  
573 **4**, 1120–1131.
- 574 Hansen, T.F. (1997). Stabilizing Selection and the Comparative Analysis of Adaptation.  
575 *Evolution*, **51**, 1341–1351.
- 576 Hansen, T.F. & Martins, E.P. (1996). Translating between microevolutionary process  
577 and macroevolutionary patterns: correlation structure of interspecific data.  
578 *Evolution*, **50**, 1404–1417.
- 579 Harmon, L.J., Losos, J.B., Jonathan Davies, T., Gillespie, R.G., Gittleman, J.L., Bryan  
580 Jennings, W., Kozak, K.H., McPeck, M.A., Moreno-Roark, F., Near, T.J., Purvis,  
581 A., Ricklefs, R.E., Schluter, D., Schulte, J.A., Seehausen, O., Sidlauskas, B.L.,  
582 Torres-Carvajal, O., Weir, J.T. & Mooers, A.T. (2010). Early bursts of body size  
583 and shape evolution are rare in comparative data. *Evolution*, **64**, 2385–2396.
- 584 Hortal, J., de Bello, F., Diniz-Filho, J.A.F., Lewinsohn, T.M., Lobo, J.M. & Ladle, R.J.  
585 (2015). Seven Shortfalls that Beset Large-Scale Knowledge of Biodiversity.  
586 *Annual Review of Ecology, Evolution, and Systematics*, **46**, 523–549.
- 587 Jetz, W. & Freckleton, R.P. (2015). Towards a general framework for predicting threat  
588 status of data-deficient species from phylogenetic, spatial and environmental  
589 information. *Philosophical transactions of the Royal Society of London. Series B*,  
590 *Biological sciences*, **370**, 20140016.
- 591 Jones, K.E., Bielby, J., Cardillo, M., Fritz, S. a., O’Dell, J., Orme, C.D.L., Safi, K.,  
592 Sechrest, W., Boakes, E.H., Carbone, C., Connolly, C., Cutts, M.J., Foster, J.K.,  
593 Grenyer, R., Habib, M., Plaster, C. a., Price, S. a., Rigby, E. a., Rist, J., Teacher,  
594 A., Bininda-Emonds, O.R.P., Gittleman, J.L., Mace, G.M. & Purvis, A. (2009).



- 595 PanTHERIA: a species-level database of life history, ecology, and geography of  
596 extant and recently extinct mammals. *Ecology*, **90**, 2648–2648.
- 597 Kamilar, J.M., Cooper, N. & B, P.T.R.S. (2013). Phylogenetic signal in primate  
598 behaviour, ecology and life history. *Proceeding of the Royal Society B*, **368**,  
599 20120341.
- 600 Kattge, J., Ogle, K., Bönsch, G., Díaz, S., Lavorel, S., Madin, J., Nadrowski, K.,  
601 Nöllert, S., Sartor, K. & Wirth, C. (2011). A generic structure for plant trait  
602 databases. *Methods in Ecology and Evolution*, **2**, 202–213.
- 603 Lukas, D. & Clutton-Brock, T.H. (2013). The evolution of social monogamy in  
604 mammals. *Science*, **341**, 526–30.
- 605 Münkemüller, T., Lavergne, S., Bzeznik, B., Dray, S., Jombart, T., Schiffrers, K. &  
606 Thuiller, W. (2012). How to measure and test phylogenetic signal. *Methods in*  
607 *Ecology and Evolution*, **3**, 743–756.
- 608 Nakagawa, S. & Freckleton, R.P. (2008). Missing inaction: the dangers of ignoring  
609 missing data. *Trends in Ecology and Evolution*, **23**, 592–596.
- 610 Nakagawa, S. & Freckleton, R.P. (2010). Model averaging, missing data and multiple  
611 imputation: a case study for behavioural ecology. *Behavioral Ecology and*  
612 *Sociobiology*, **65**, 103–116.
- 613 Oba, S., Sato, M., Takemasa, I., Monden, M., Matsubara, K. & Ishii, S. (2003). A  
614 Bayesian missing value estimation method for gene expression profile data.  
615 *Bioinformatics*, **19**, 2088–2096.
- 616 Paradis, E., Claude, J. & Strimmer, K. (2004). APE: Analyses of Phylogenetics and  
617 Evolution in R language. *Bioinformatics*, **20**, 289–290.
- 618 Penone, C., Davidson, A.D., Shoemaker, K.T., Marco, M. Di, Rondinini, C., Brooks,  
619 T.M., Young, B.E., Graham, C.H. & Costa, G.C. (2014). Imputation of missing  
620 data in life-history traits datasets: which approach performs the best? *Methods in*  
621 *Ecology and Evolution*, **5**, 961–970.
- 622 Purvis, A., Gittleman, J.L., Cowlshaw, G. & Mace, G.M. (2000). Predicting extinction  
623 risk in declining species. *Proceeding of the Royal Society B*, **267**, 1947–1952.
- 624 R Core Team. (2015). R: A Language and Environment for Statistical Computing. *R*  
625 *Foundation for Statistical Computing*.
- 626 Ram, K. (2013). Git can facilitate greater reproducibility and increased transparency in  
627 science. *Source code for biology and medicine*, **8**, 7.
- 628 Reddy, S. & Dávalos, L.M. (2003). Geographical sampling bias and its implications for  
629 conservation priorities in Africa. *Journal of Biogeography*, **30**, 1719–1727.
- 630 Reichman, O.J., Jones, M.B. & Schildhauer, M.P. (2011). Challenges and opportunities  
631 of open data in ecology. *Science*, **331**, 703–705.
- 632 Revell, L.J. (2012). phytools: an R package for phylogenetic comparative biology (and  
633 other things). *Methods in Ecology and Evolution*, **3**, 217–223.
- 634 Revell, L.J., Harmon, L.J. & Collar, D.C. (2008). Phylogenetic signal, evolutionary  
635 process, and rate. *Systematic biology*, **57**, 591–601.
- 636 Rosado, B.H.P., de S. L. Figueiredo, M., de Mattos, E.A. & Grelle, C.E. V. (2015).  
637 Eltonian shortfall due to the Grinnellian view: functional ecology between the  
638 mismatch of niche concepts. *Ecography*,

- 639 <http://onlinelibrary.wiley.com/doi/10.1111/ecog.01>.
- 640 Rubin, D.. (1976). Inference and Missing Data. *Biometrika*, **63**, 581–592.
- 641 Schafer, J.L. & Graham, J.W. (2002). Missing Data: Our View of the State of the Art.  
642 *Psychological Methods*, **7**, 147–177.
- 643 Schrodt, F., Kattge, J., Shan, H., Fazayeli, F., Joswig, J., Banerjee, A., Reichstein, M.,  
644 Bönisch, G., Díaz, S., Dickie, J., Gillison, A., Karpatne, A., Lavorel, S., Leadley,  
645 P., Wirth, C.B., Wright, I.J., Wright, S.J. & Reich, P.B. (2015). BHPMF - a  
646 hierarchical Bayesian approach to gap-filling and trait prediction for macroecology  
647 and functional biogeography. *Global Ecology and Biogeography*, **24**, 1510–1521.
- 648 Slater, G.J., Harmon, L.J., Wegmann, D., Joyce, P., Revell, L.J. & Alfaro, M.E. (2012).  
649 Fitting models of continuous trait evolution to incompletely sampled comparative  
650 data using approximate bayesian computation. *Evolution*, **66**, 752–762.
- 651 Swenson, N.G. (2014). Phylogenetic imputation of plant functional trait databases.  
652 *Ecography*, **37**, 105–110.
- 653 Taugourdeau, S., Villerd, J., Plantureux, S., Huguenin-Elie, O. & Amiaud, B. (2014).  
654 Filling the gap in functional trait databases: use of ecological hypotheses to replace  
655 missing data. *Ecology and Evolution*, **4**, 944–958.
- 656 Venables, W.N. & Ripley, B.D. (2002). *Modern Applied Statistics with S*, 4th edn.  
657 Springer, New York.
- 658 Vilela, B. & Villalobos, F. (2015). letsR: a new R package for data handling and  
659 analysis in macroecology. *Methods in Ecology and Evolution*, n/a–n/a.
- 660 Vilela, B., Villalobos, F., Rodríguez, M.Á. & Terribile, L.C. (2014). Body Size,  
661 Extinction Risk and Knowledge Bias in New World Snakes. *PloS one*, **9**, e113429.
- 662 Webb, C.O., Ackerly, D.D., Mcpeck, M.A. & Donoghue, M.J. (2002). Phylogenies and  
663 Community Ecology. 475–505.
- 664 Wiens, J.J. & Graham, C.H. (2005). Niche Conservatism: Integrating Evolution,  
665 Ecology, and Conservation Biology. *Annual Review of Ecology, Evolution, and*  
666 *Systematics*, **36**, 519–539.
- 667 Wilman, H., Belmaker, J., Simpson, J., de la Rosa, C., Rivadeneira, M.M. & Jetz, W.  
668 (2014). EltonTraits 1.0 : Species-level foraging attributes of the world 's birds and  
669 mammals. *Ecology*, **95**, 2027.
- 670

Table 1. Model selection of descriptive statistic and phylogenetic signal errors. The values represent the  $\Delta AICc$  of the three best models for each error.

| Models  | Blomberg's K | PS Moran | Imputation error | Mean  | Variance | Regression Coefficient |
|---------|--------------|----------|------------------|-------|----------|------------------------|
| Model 1 | 6.23         | -        | 0.00             | 0.04  | 11.71    | -                      |
| Model 2 | 0.00         | -        | 4.71             | 0.00  | 0.00     | 8.28                   |
| Model 3 | 3.79         | -        | -                | -     | 1.94     | -                      |
| Model 4 | -            | 0.00     | -                | 15.45 | -        | 0.00                   |
| Model 5 | -            | 1.07     | -                | -     | -        | 3.74                   |
| Model 6 | -            | -        | 34.85            | -     | -        | -                      |
| Model 7 | -            | 3.31     | -                | -     | -        | -                      |

671

672

673

674

675

676

677

678

679

680

681

682

683

684

685

Table 2. Description of selected models explaining estimation error of descriptive statistics (mean, variance and regression coefficient) and phylogenetic signal (Blomberg's K and Moran Correlogram).

| Terms          | Model 1 | Model 2 | Model 3 | Model 4 | Model 5 | Model 6 | Model 7 |
|----------------|---------|---------|---------|---------|---------|---------|---------|
| Mec            | X       | X       | X       | X       | X       | X       | X       |
| Met            | X       | X       | X       | X       | X       | X       | X       |
| OU             | X       | X       | X       | X       | X       | X       | X       |
| Per            | X       | X       | X       | X       | X       | X       | X       |
| Mec:Met        | X       | X       | X       | X       | X       | X       | X       |
| Mec:OU         | X       | X       | X       | X       | X       | X       | -       |
| Mec:Per        | X       | X       | X       | X       | X       | X       | X       |
| Met:Per        | X       | X       | X       | X       | X       | X       | X       |
| OU:Per         | X       | X       | X       | X       | X       | X       | X       |
| Mec:Met:OU     | X       | X       | X       | -       | -       | X       | -       |
| Mec:Met:Per    | X       | X       | X       | X       | X       | X       | X       |
| Mec:OU:Per     | X       | X       | -       | X       | -       | X       | -       |
| Met:OU:Per     | X       | X       | X       | X       | X       | -       | -       |
| Mec:Met:OU:Per | X       | -       | -       | -       | -       | -       | -       |

Mec = missing data mechanism, Met = imputation method, OU = OU selection strength, Per = missing data percentage. ":" means interaction among variables.

686

687

688

689

690

691

692

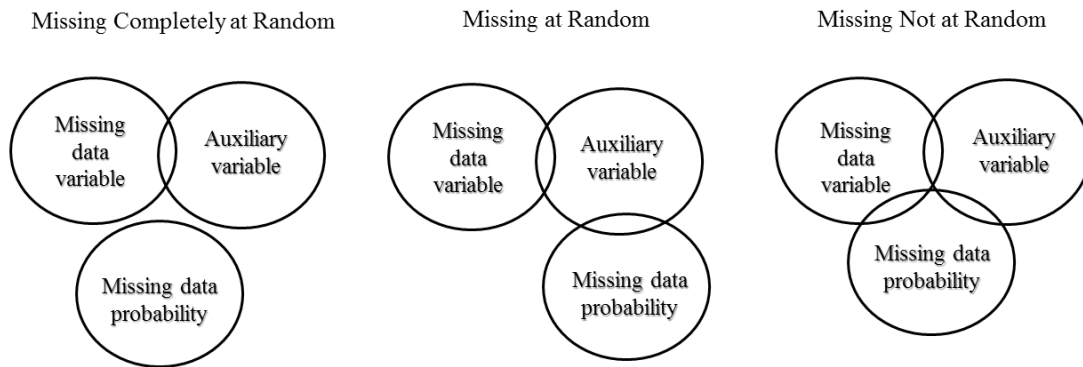

693

694 **Figure 1.** Correlation structure among variables in each missing data mechanism. Circles

695 represent model components and their intersection represents correlation among them.

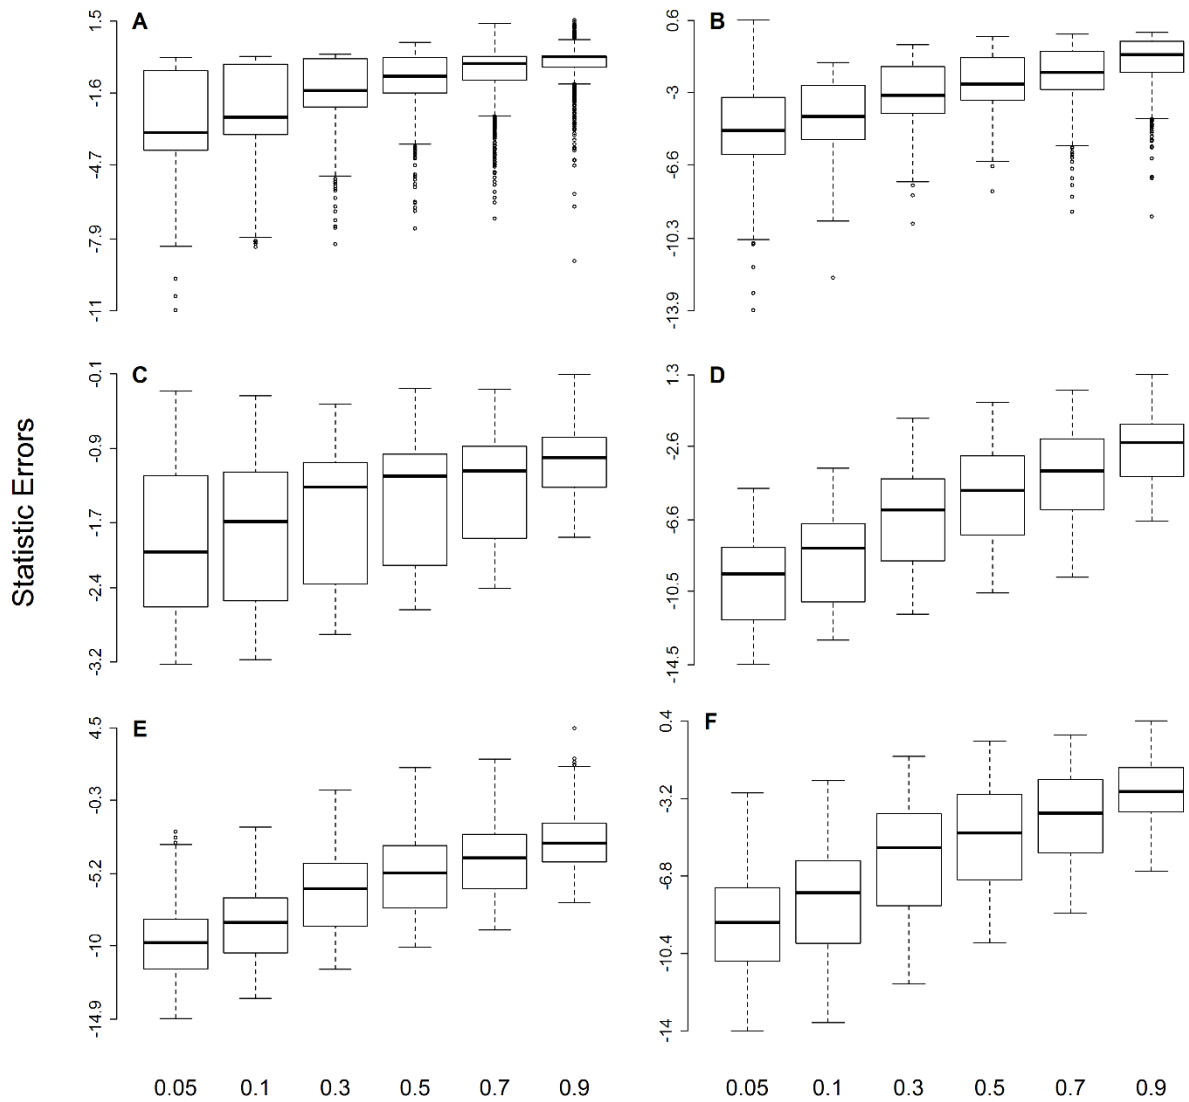

696

697 **Figure 2.** Missing data percentage and statistic estimation errors. (A) Logarithm of  
698 absolute average proportions of Blomberg's K change after imputation or deletion, (B)  
699 Logarithm of average proportion of Moran's Correlogram values change, (C)  
700 Imputation error measured as logarithm of average NRMSE, (D) Logarithm of MSE of  
701 trait mean, (E) Logarithm of MSE of trait variance and (F) Logarithm of MSE of  
702 regression coefficient.

703

704

705

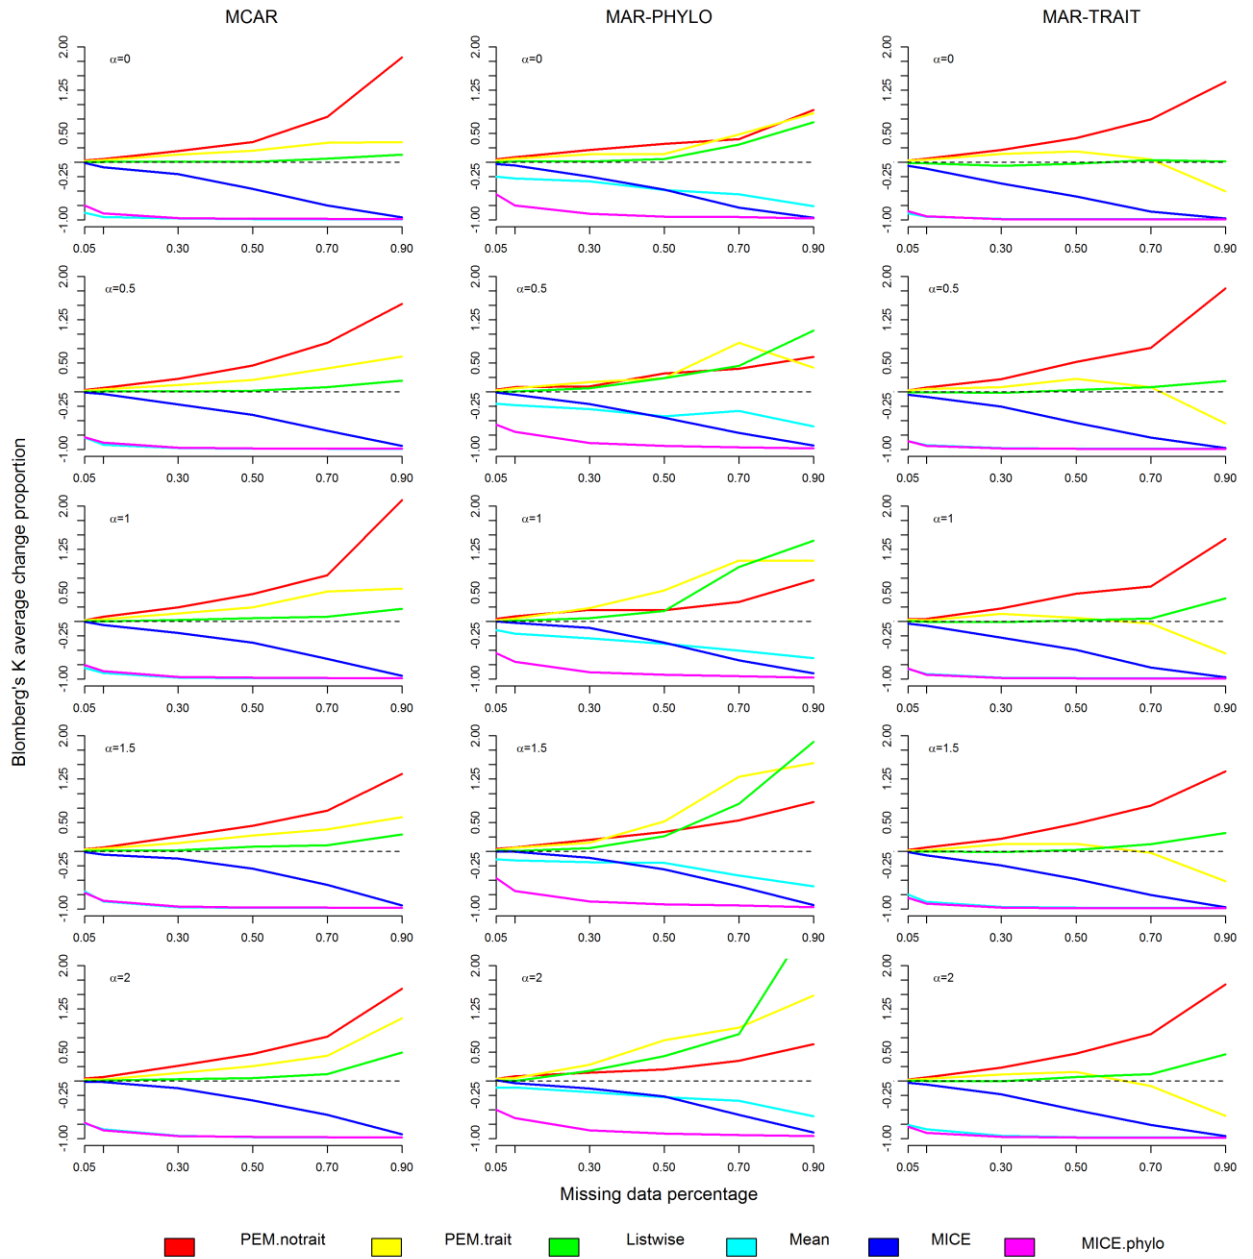

706

707 **Figure 3.** Blomberg's K average change proportion under different methods, OU

708 selective strength, missing data percentage and mechanisms.

709

710

711

712

713

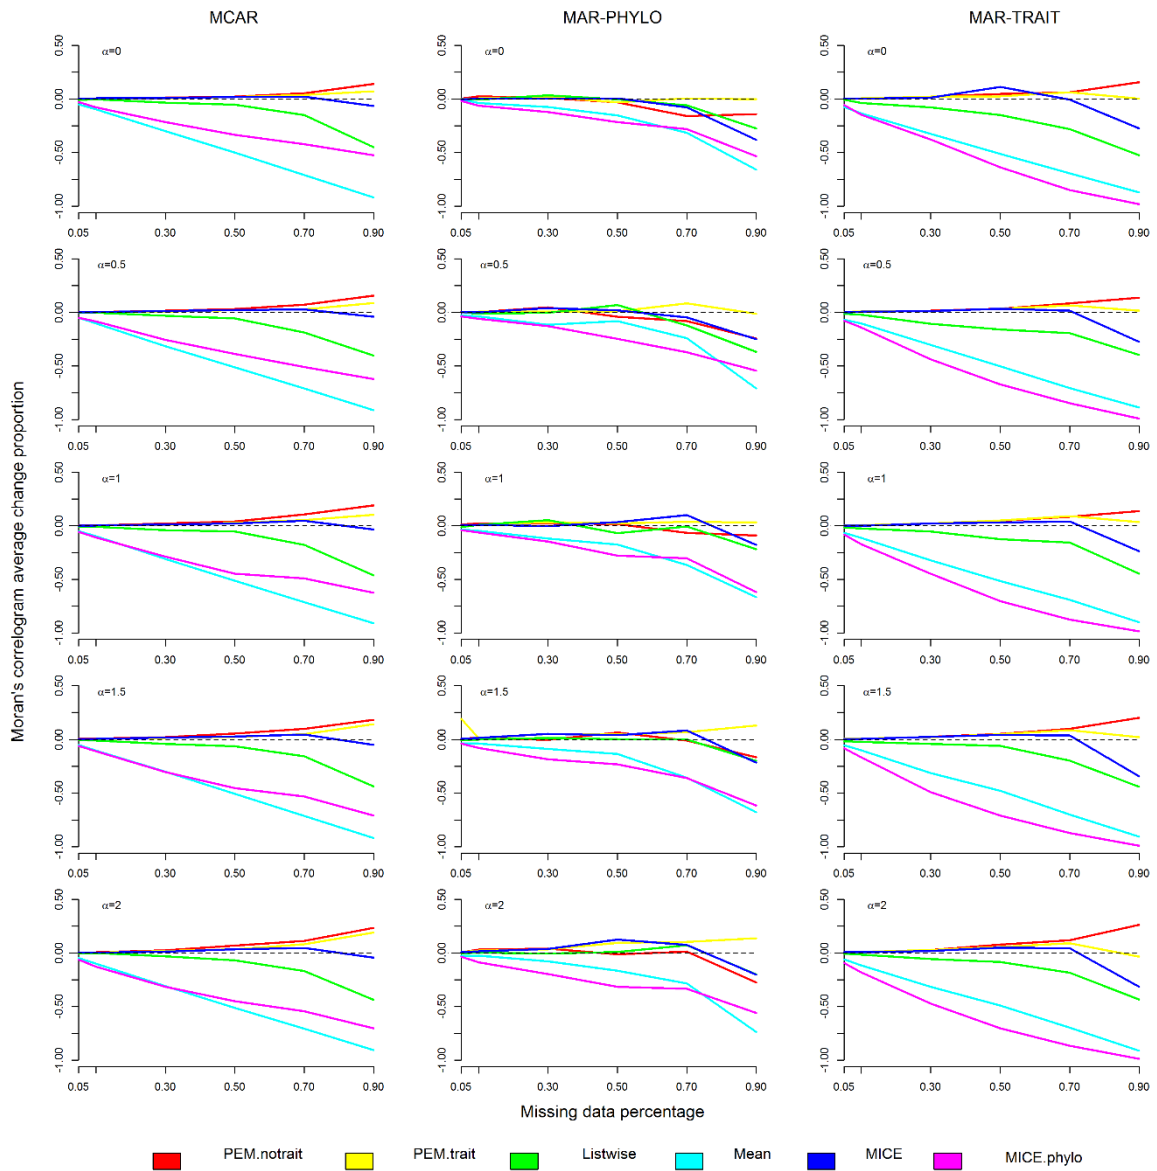

714

715 **Figure 4.** Moran's Correlogram average change proportion under different methods,  
716 OU selective strength, missing data percentage and mechanisms.

717

718

719

720

721



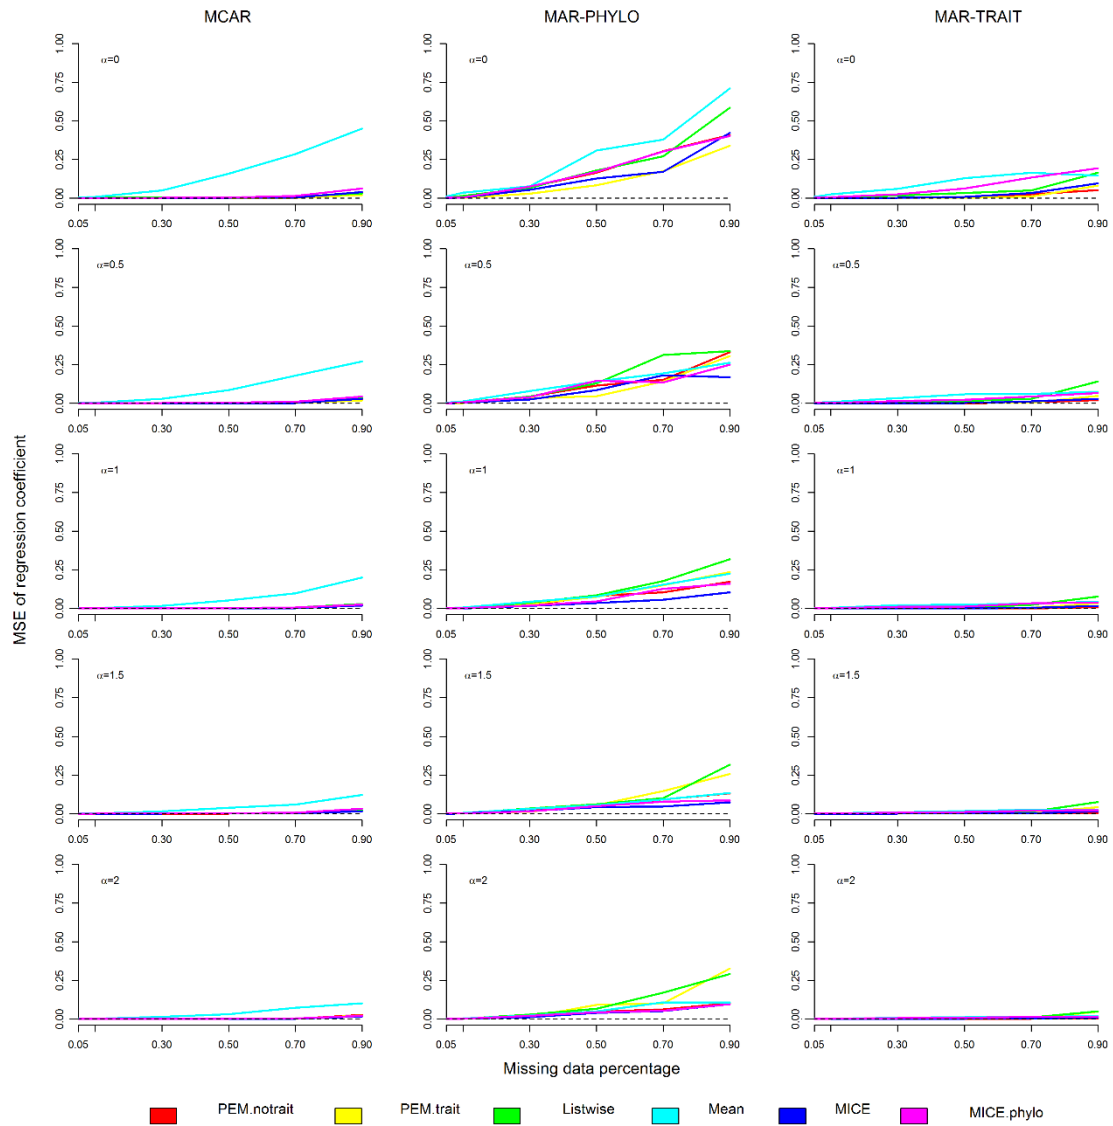

722

723 **Figure 5.** Regression coefficient MSE (mean squared error) under different methods,  
724 OU selective strength, missing data percentage and mechanisms.

725

726

727

728

729

730

731

732

733

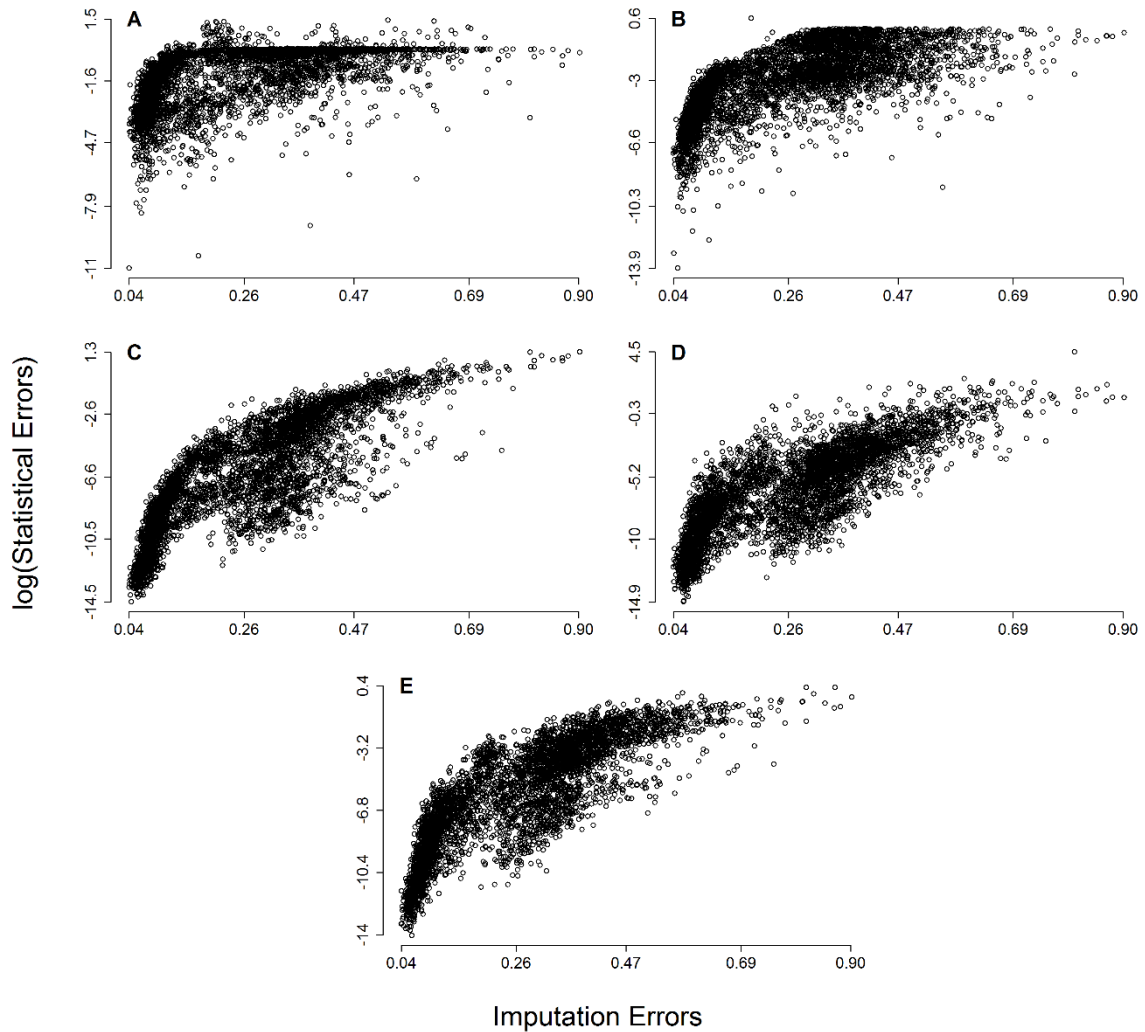

734

735 **Figure 6.** Scatterplot of imputation errors (average NRMSE) and statistical errors. (A)  
736 Logarithm of absolute average Blomberg's K change proportion, (B) Logarithm of  
737 absolute average Moran's Correlogram change proportion, (C) Logarithm of mean MSE,  
738 (D) Logarithm of variance MSE and (E) Logarithm of regression coefficient MSE.

739

740

741

742

743

744

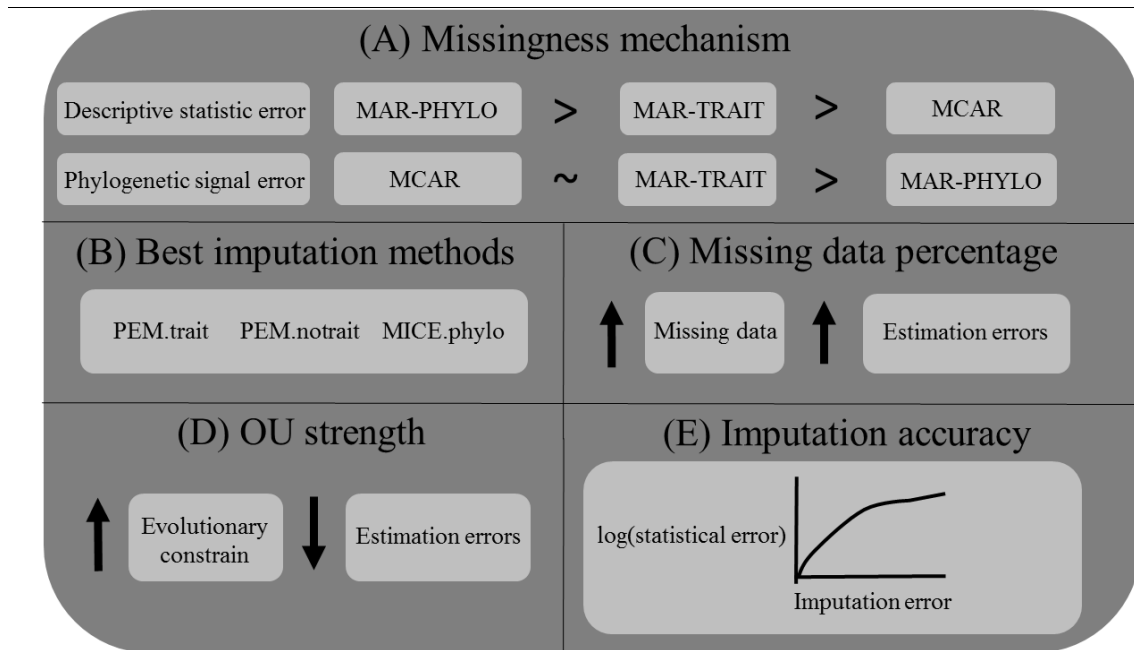

745

746

747 **Figure 7.** Summary of the main results showing (A) the differences on estimation errors  
748 among missing data mechanisms and estimated statistics; (B) highlighting the best  
749 imputation methods; (C) the effect of missing data percentage in statistical estimation;  
750 (D) OU selection strength; and (E) the non-linear relationship between imputation error  
751 and statistical estimation error logarithm.

752
